# Supplementary material
Source: PubMed Central journal article supplement (PMC9520608)
Supplement: NIHMS1727583-supplement-Supplemental_Material_1.pdf [file NIHMS1727583-supplement-Supplemental_Material_1.pdf]

## Supplemental A

Table 1S.

### Health Behaviors Questions

| Factor   | Question Number | Text                                          | Scale                                                                                               |
|----------|-----------------|-----------------------------------------------|-----------------------------------------------------------------------------------------------------|
| Finances |                 |                                               |                                                                                                     |
|          | FIN1            | Give to charity?                              | Never (1), Less than once a year (2), Once a year (3), Twice a year (4), More than twice a year (5) |
|          | FIN2            | Pay for your own health insurance?            | Never (1), Rarely (2), sometimes (3), Almost Always (4), Not applicable (5)                         |
|          | FIN3            | Are charged late fees?                        | Never (1), Rarely (2), sometimes (3), Almost Always (4), Not applicable (5)                         |
|          | FIN4            | Pay all bills in full?                        | Never (1), Rarely (2), sometimes (3), Almost Always (4), Not applicable (5)                         |
|          | FIN5            | Save money other than retirement savings?     | Never (1), Rarely (2), Sometimes (3), Almost Always (4)                                             |
|          | FIN6            | Pay off your credit card balance every month? | Never (1), Rarely (2), sometimes (3), Almost Always (4), Not applicable (5)                         |
|          | FIN7            | Overuse credit card?                          | Never (1), Rarely (2), sometimes (3), Almost Always (4), Not applicable (5)                         |
| Fitness  |                 |                                               |                                                                                                     |
|          | FIT1            | Take the stairs instead of the elevator?      | Never (1), Rarely (2), Sometimes (3), Almost Always (4)                                             |
|          | FIT2            | Maintain consistent diet/exercise habits?     | Never (1), Rarely (2), Sometimes (3), Almost Always (4)                                             |

|      |       |                                                                     |                                                                                                       |
|------|-------|---------------------------------------------------------------------|-------------------------------------------------------------------------------------------------------|
|      | FIT3  | Drink more than 8 glasses of water a day?                           | Never (1), Rarely (2), Sometimes (3), Almost Always (4)                                               |
|      | FIT4* | How many hours of sleep do you get per night on average?            | Continuous                                                                                            |
|      | FIT5  | Strenuous or high-intensity exercise?                               | Never (1), Rarely (2), Sometimes (3), Almost Always (4)                                               |
|      | FIT6  | Yoga or active stretching                                           | Never (1), Rarely (2), Sometimes (3), Almost Always (4)                                               |
|      | FIT7  | How many times per week do you exercise [for a minimum of 20 mins]? | 0 times (1), 1 time (2), 2 times (3), 3 times (4), 4 times (5), 5 or more times (6)                   |
| Food |       |                                                                     |                                                                                                       |
|      | FO1   | Skip breakfast?                                                     | Never (1), Rarely (2), Sometimes (3), Almost Always (4)                                               |
|      | FO2   | Track your calorie intake?                                          | Never (1), Rarely (2), Sometimes (3), Almost Always (4)                                               |
|      | FO3   | Drink soda with sugar?                                              | Never (1), Rarely (2), Sometimes (3), Almost Always (4)                                               |
|      | FO4*  | Drink soda with sweetener (other than sugar)?                       | Never (1), Rarely (2), Sometimes (3), Almost Always (4)                                               |
|      | FO5   | Drink energy drinks?                                                | Never (1), Rarely (2), Sometimes (3), Almost Always (4)                                               |
|      | FO6   | Eat fast food?                                                      | Never (1), Rarely (2), Sometimes (3), Almost Always (4)                                               |
|      | FO7   | Eat out to avoid cooking?                                           | Never (1), Rarely (2), Sometimes (3), Almost Always (4)                                               |
|      | FO8   | Eat heavy meals before bed?                                         | Never (1), Rarely (2), Sometimes (3), Almost Always (4)                                               |
|      | FO9   | Plan your meals ahead of time?                                      | Never (1), Rarely (2), Sometimes (3), Almost Always (4)                                               |
|      | FO10  | Plan food shopping in advance?                                      | Never (1), Rarely (2), Sometimes (3), Almost Always (4)                                               |
|      | FO11  | How many times per week do you cook dinner at home on average?      | 0 times (1), 1 time (2), 2 times (3), 3 times (4), 4 times (5), 5 times (6), 6 times (7), 7 times (8) |
|      | FO12  | How many snacks do you eat per day on average?                      | Continuous                                                                                            |

|                   |      |                                                     |                                                                                                     |
|-------------------|------|-----------------------------------------------------|-----------------------------------------------------------------------------------------------------|
| Health            | FO13 | How many cups of caffeinated beverages per day?     | Continuous                                                                                          |
|                   | H1   | Floss your teeth?                                   | Never (1), Rarely (2), Sometimes (3), Almost Always (4)                                             |
|                   | H2   | Visit the dentist?                                  | Never (1), Less than once a year (2), Once a year (3), Twice a year (4), More than twice a year (5) |
|                   | H3   | Get a flu shot?                                     | Never (1), Less than once a year (2), Once a year (3), Twice a year (4), More than twice a year (5) |
|                   | H4   | Get a cholesterol test?                             | Never (1), Less than once a year (2), Once a year (3), Twice a year (4), More than twice a year (5) |
|                   | H5   | Get concerned about your health?                    | Never (1), Rarely (2), Sometimes (3), Almost Always (4)                                             |
|                   | H6   | Use sunscreen?                                      | Never (1), Rarely (2), Sometimes (3), Almost Always (4)                                             |
|                   | H7   | Check your blood pressure?                          | Never (1), Rarely (2), Sometimes (3), Almost Always (4)                                             |
|                   | H8   | Follow a doctor's treatment plans?                  | Never (1), Rarely (2), Sometimes (3), Almost Always (4)                                             |
|                   | H9   | Go to the doctor for care when you are sick?        | Never (1), Rarely (2), Sometimes (3), Almost Always (4)                                             |
|                   | H10  | Take prescription medicine as prescribed?           | Never (1), Rarely (2), sometimes (3), Almost Always (4), Not applicable (5)                         |
| Household Savings |      |                                                     |                                                                                                     |
|                   | HS1  | Keep air conditioning running often during summer?  | Never (1), Rarely (2), sometimes (3), Almost Always (4), Not applicable (5)                         |
|                   | HS2  | Try to use less electricity than average?           | Never (1), Rarely (2), sometimes (3), Almost Always (4), Not applicable (5)                         |
|                   | HS3  | Keep heat low during winter to reduce heating bill? | Never (1), Rarely (2), sometimes (3), Almost Always (4), Not applicable (5)                         |

|                      |      |                                                                  |                                                                             |
|----------------------|------|------------------------------------------------------------------|-----------------------------------------------------------------------------|
|                      | HS4  | Program your thermostat to turn on/off at specific times of day? | Never (1), Rarely (2), sometimes (3), Almost Always (4), Not applicable (5) |
|                      | HS5* | Keep home well-insulated?                                        | Never (1), Rarely (2), sometimes (3), Almost Always (4), Not applicable (5) |
|                      | HS6  | Use energy efficient lighting (fluorescent bulbs)?               | Never (1), Rarely (2), sometimes (3), Almost Always (4), Not applicable (5) |
| Personal Development |      |                                                                  |                                                                             |
|                      | PD1  | Set personal goals?                                              | Never (1), Rarely (2), Sometimes (3), Almost Always (4)                     |
|                      | PD2  | Socialize with friends?                                          | Never (1), Rarely (2), Sometimes (3), Almost Always (4)                     |
|                      | PD3  | Spend time with family?                                          | Never (1), Rarely (2), Sometimes (3), Almost Always (4)                     |
|                      | PD4  | Hold grudges?                                                    | Never (1), Rarely (2), Sometimes (3), Almost Always (4)                     |
|                      | PD5  | How stressed do you feel in your life currently?                 | Sliding scale: 0-10. "0 being no stress, 10 being very high stress"         |
|                      | PD6  | How well do you feel you manage your stress daily?               | Sliding scale: 0-10. "0 being not managed, 10 being managed very well"      |
|                      | PD7* | How many hours of TV do you watch per day on average?            | Continuous                                                                  |
| Risk Behaviors       |      |                                                                  |                                                                             |
|                      | RB1  | Use tobacco?                                                     | Never (1), Rarely (2), Sometimes (3), Almost Always (4)                     |
|                      | RB2  | Use illegal drugs?                                               | Never (1), Rarely (2), Sometimes (3), Almost Always (4)                     |
|                      | RB3  | Unprotected Sex?                                                 | Never (1), Rarely (2), Sometimes (3), Almost Always (4)                     |
|                      | RB4  | Gamble?                                                          | Never (1), Rarely (2), Sometimes (3), Almost Always (4)                     |
| Safe Driving         |      |                                                                  |                                                                             |

|      |                                                         |                                                                                                                              |
|------|---------------------------------------------------------|------------------------------------------------------------------------------------------------------------------------------|
| SD1  | Initiate a text conversation while driving?             | Never (1), Rarely (2), Sometimes (3), Almost Always (4)                                                                      |
| SD2  | Reply to a text while driving?                          | Never (1), Rarely (2), Sometimes (3), Almost Always (4)                                                                      |
| SD3  | Read a text while driving?                              | Never (1), Rarely (2), Sometimes (3), Almost Always (4)                                                                      |
| SD4* | Wear a seatbelt?                                        | Never (1), Rarely (2), Sometimes (3), Almost Always (4)                                                                      |
| SD5* | Maintain your vehicle (oil changes, etc.)?              | Never (1), Less than once a year (2), Once a year (3), Twice a year (4), More than twice a year (5)                          |
| SD6  | Drive at high speeds?                                   | Never (1), Rarely (2), sometimes (3), Almost Always (4), Not applicable (5)                                                  |
| SD7  | How dangerous would you consider texting while driving? | Not very dangerous at all (1), Slightly dangerous (2), Moderately dangerous (3), Very dangerous (4), Extremely dangerous (5) |

---

\* Indicates questions that were not included in the final model.
