# Supplementary material
Source: PubMed Central journal article supplement (PMC9520608)
Supplement: NIHMS1727583-supplement-Supplemental_Material_2.pdf [file NIHMS1727583-supplement-Supplemental_Material_2.pdf]

**SUPPLEMENTAL B**

Table 2S.

Complete Structural Equation Model Results

| Latent Factor   | Measured Variable | Estimate (SE) | Standardized Factor Loading |
|-----------------|-------------------|---------------|-----------------------------|
|                 |                   |               | <u>Healthy-Weight/Obese</u> |
| <b>Finances</b> |                   |               |                             |
|                 | FIN1              | 1.000         | 0.349/0.446                 |
|                 | FIN2              | 1.064 (0.433) | 0.370/0.503*                |
|                 | FIN3              | -1.541(0.456) | -0.522/-0.501***            |
|                 | FIN4              | 1.163(0.421)  | 0.402/0.449**               |
|                 | FIN5              | 1.750(0.541)  | 0.585/0.490*                |
|                 | FIN6              | 0.786(0.283)  | 0.276/0.080*                |
|                 | FIN7              | -1.111(0.378) | -0.386/-0.372*              |
| <b>Fitness</b>  |                   |               |                             |
|                 | FIT1              | 1.000         | 0.491/0.510                 |
|                 | FIT2              | 2.179(0.261)  | 1.034/0.920***              |
|                 | FIT3              | 0.833(0.168)  | 0.410/0.465***              |
|                 | FIT5              | 1.559(0.271)  | 0.755/0.797***              |
|                 | FIT6              | 0.812(0.253)  | 0.400/0.506*                |
|                 | FIT7              | 1.388(0.174)  | 0.675/0.807***              |
| <b>Food</b>     |                   |               |                             |
|                 | FO1               | 1.000         | 0.357/0.401                 |
|                 | FO2               | -1.079(0.322) | -0.385/-0.465**             |
|                 | FO3               | 1.949(0.480)  | 0.674/0.487***              |
|                 | FO5               | 0.967(0.442)  | 0.346/0.212*                |
|                 | FO6               | 1.611(0.385)  | 0.565/0.529***              |

|                      |      |               |                  |
|----------------------|------|---------------|------------------|
|                      | FO7  | 1.371(0.366)  | 0.485/0.513***   |
|                      | FO8  | 1.897(0.496)  | 0.657/0.745***   |
|                      | FO9  | -1.223(0.377) | -0.434/-0.466**  |
|                      | FO10 | -1.393(0.512) | -0.492/-0.445**  |
|                      | FO11 | -1.059(0.282) | -0.378/-0.409*** |
|                      | FO12 | 1.438(0.418)  | 0.407/0.532***   |
|                      | FO13 | 0.588(0.272)  | 0.212/0.191*     |
| Health               |      |               |                  |
|                      | H1   | 1.000         | 0.627/0.736      |
|                      | H2   | 0.911(0.291)  | 0.573/0.496**    |
|                      | H3   | 0.620(0.193)  | 0.393/0.373**    |
|                      | H4   | 0.925(0.384)  | 0.582/0.488*     |
|                      | H5   | 0.431(0.208)  | 0.275/0.331*     |
|                      | H6   | 0.931(0.249)  | 0.586/0.660***   |
|                      | H7   | 0.685(0.264)  | 0.434/0.423**    |
|                      | H8   | 0.829(0.227)  | 0.524/0.659***   |
|                      | H9   | 0.825(0.247)  | 0.521/0.541***   |
|                      | H10  | 0.667(0.324)  | 0.423/0.681*     |
| Household Savings    |      |               |                  |
|                      | HS1  | 1.000         | 0.387/0.410      |
|                      | HS2  | -1.604(0.630) | -0.619/0.640*    |
|                      | HS3  | -1.033(0.547) | -0.399/-0.379*   |
|                      | HS4  | -1.202(0.614) | -0.464/-0.417*   |
|                      | HS6  | -1.555(0.575) | -0.600/-0.587**  |
| Personal Development |      |               |                  |
|                      | PD1  | 1.000         | 0.509/0.452      |
|                      | PD2  | 0.849(0.243)  | 0.434/0.386***   |

|                | PD3               | 0.901(0.213)  | 0.460/0.368***                      |
|----------------|-------------------|---------------|-------------------------------------|
|                | PD4               | -1.170(0.248) | -0.592/-0.546***                    |
|                | PD5               | -1.661(0.345) | -0.819/-0.744***                    |
|                | PD6               | 1.333(0.273)  | 0.669/0.707***                      |
| Risk Behaviors |                   |               |                                     |
|                | RB1               | 1.000         | 0.651/0.597                         |
|                | RB2               | 1.175(0.414)  | 0.212/0.191*                        |
|                | RB3               | 0.971(0.414)  | 0.622/0.584*                        |
|                | RB4               | 0.537(0.195)  | 0.347/0.361**                       |
| Safe Driving   |                   |               |                                     |
|                | SD1               | 1.000         | 0.914/0.879                         |
|                | SD2               | 1.123(0.214)  | 1.024/0.976***                      |
|                | SD3               | 0.967(0.119)  | 0.886/0.952***                      |
|                | SD6               | 0.622(0.067)  | 0.574/0.514***                      |
|                | SD7               | -0.767(0.290) | -0.707/-0.463**                     |
| Regressions    | Measured Variable | Estimate      | Standardized Regression Coefficient |
|                |                   |               | Healthy-Weight<br>Obese             |
| Finances       |                   |               |                                     |
|                | Delay Discounting | -0.090(0.029) | -0.539**                            |
|                |                   | -0.062(0.018) | -0.423***                           |
|                | Food Demand       | -0.065(0.031) | -0.190*                             |
|                |                   | -0.006(0.018) | -0.028                              |
|                | Power of Food     | -0.002(0.001) | -0.100                              |
|                |                   | -0.002(0.001) | -0.102                              |
| Fitness        |                   |               |                                     |
|                | Delay Discounting | -0.030(0.015) | -0.127*                             |
|                |                   | -0.036(0.014) | -0.157**                            |
|                | Food Demand       | -0.069(0.032) | -0.146*                             |
|                |                   | -0.009(0.018) | -0.028                              |

|                      |                   |                                |                        |
|----------------------|-------------------|--------------------------------|------------------------|
|                      | Power of Food     | -0.005(0.002)<br>-0.006(0.001) | -0.170**<br>-0.267***  |
| Food                 |                   |                                |                        |
|                      | Delay Discounting | 0.031(0.009)<br>0.029(0.011)   | 0.184***<br>0.177**    |
|                      | Food Demand       | 0.093(0.020)<br>0.041(0.013)   | 0.268***<br>0.178*     |
|                      | Power of Food     | 0.005(0.002)<br>0.006(0.002)   | 0.248**<br>0.327***    |
| Health               |                   |                                |                        |
|                      | Delay Discounting | -0.051(0.022)<br>-0.050(0.022) | -0.170*<br>-0.175*     |
|                      | Food Demand       | -0.150(0.058)<br>-0.017(0.030) | -0.244*<br>-0.043      |
|                      | Power of Food     | -0.001(0.002)<br>-0.001(0.002) | -0.023<br>-0.023       |
| Household Savings    |                   |                                |                        |
|                      | Delay Discounting | 0.026(0.0121)<br>0.015(0.012)  | 0.140*<br>0.087        |
|                      | Food Demand       | -0.012(0.026)<br>0.009(0.017)  | -0.033<br>0.036        |
|                      | Power of Food     | 0.001(0.002)<br>0.003(0.001)   | 0.070<br>0.138*        |
| Personal Development |                   |                                |                        |
|                      | Delay Discounting | -0.023(0.013)<br>-0.016(0.011) | -0.096*<br>-0.067      |
|                      | Food Demand       | -0.76(0.031)<br>0.006(0.014)   | -0.152*<br>0.020       |
|                      | Power of Food     | -0.009(0.002)<br>-0.008(0.002) | -0.311***<br>-0.341*** |
| Risk Behaviors       |                   |                                |                        |
|                      | Delay Discounting | 0.055(0.023)<br>0.081(0.029)   | 0.179*<br>0.268**      |

|                                      | Food Demand          | 0.106(0.046)<br>-0.014(0.046) | 0.170*<br>-0.033     |
|--------------------------------------|----------------------|-------------------------------|----------------------|
|                                      | Power of Food        | 0.000(0.003)<br>0.004(0.003)  | 0.011<br>0.118       |
| Safe Driving                         | Delay Discounting    | 0.026(0.029)<br>0.015(0.026)  | 0.059<br>0.034       |
|                                      | Food Demand          | 0.151(0.061)<br>0.019(0.029)  | 0.169*<br>0.031      |
|                                      | Power of Food        | 0.002(0.003)<br>0.008(0.003)  | 0.035<br>0.178**     |
| Factor Correlations With Regressions | Latent Factor        | Covariance Estimate           | Residual Correlation |
|                                      |                      | Healthy-Weight/Obese          |                      |
| Finances                             | Fitness              | 0.066(0.026)                  | 0.0481*              |
|                                      | Food                 | -0.056(0.025)                 | -0.599*              |
|                                      | Health               | 0.077(0.033)                  | 0.441*               |
|                                      | Household Savings    | -0.042(0.026)                 | -0.385               |
|                                      | Personal Development | 0.089(0.030)                  | 0.646**              |
|                                      | Risk Behaviors       | -0.061(0.031)                 | -0.340*              |
|                                      | Safe Driving         | -0.035(0.038)                 | -0.133               |
| Fitness                              | Food                 | -0.080(0.023)                 | -0.520***            |
|                                      | Health               | 0.099(0.039)                  | 0.342*               |
|                                      | Household Savings    | -0.058(0.038)                 | -0.316               |
|                                      | Personal Development | 0.078(0.022)                  | 0.340***             |

|                      |                      |               |          |
|----------------------|----------------------|---------------|----------|
|                      | Risk Behaviors       | -0.046(0.045) | -0.153   |
|                      | Safe Driving         | -0.051(0.044) | -0.118   |
| Food                 |                      |               |          |
|                      | Health               | -0.079(0.030) | -0.402** |
|                      | Household Savings    | 0.036(0.020)  | 0.289*   |
|                      | Personal Development | -0.046(0.019) | -0.294*  |
|                      | Risk Behaviors       | 0.060(0.030)  | 0.295*   |
|                      | Safe Driving         | 0.088(0.030)  | 0.300**  |
| Health               |                      |               |          |
|                      | Household Savings    | -0.048(0.038) | -0.207   |
|                      | Personal Development | 0.084(0.039)  | 0.287*   |
|                      | Risk Behaviors       | -0.073(0.044) | -0.191   |
|                      | Safe Driving         | -0.114(0.052) | -0.261*  |
| Household Savings    |                      |               |          |
|                      | Personal Development | -0.035(0.029) | -0.188   |
|                      | Risk Behaviors       | 0.021(0.045)  | 0.085    |
|                      | Safe Driving         | 0.050(0.047)  | 0.141    |
| Personal Development |                      |               |          |
|                      | Risk Behaviors       | -0.040(0.044) | -0.134   |
|                      | Safe Driving         | -0.114(0.052) | -0.261*  |
| Risk Behaviors       |                      |               |          |

|                                         | Safe Driving         | 0.061(0.074)        | 0.106              |
|-----------------------------------------|----------------------|---------------------|--------------------|
| Factor Correlations Without Regressions | Latent Factor        | Covariance Estimate | Factor Correlation |
| Healthy-Weight/Obese                    |                      |                     |                    |
| Finances                                |                      |                     |                    |
|                                         | Fitness              | 0.098(0.015)        | 0.498***           |
|                                         | Food                 | -0.139(0.021)       | -0.644***          |
|                                         | Health               | 0.090(0.016)        | 0.435***           |
|                                         | Household Savings    | -0.031(0.010)       | -0.218**           |
|                                         | Personal Development | 0.147(0.024)        | 0.570***           |
|                                         | Risk Behaviors       | -0.075(0.020)       | -0.293***          |
|                                         | Safe Driving         | -0.079(0.020)       | -0.221***          |
| Fitness                                 |                      |                     |                    |
|                                         | Food                 | -0.139(0.021)       | -0.644***          |
|                                         | Health               | 0.096(0.017)        | 0.365***           |
|                                         | Household Savings    | -0.045(0.012)       | -0.329***          |
|                                         | Personal Development | 0.169(0.022)        | 0.513***           |
|                                         | Risk Behaviors       | -0.071(0.021)       | -0.217**           |
|                                         | Safe Driving         | -0.058(0.022)       | -0.127**           |
| Food                                    |                      |                     |                    |
|                                         | Health               | -0.099(0.018)       | -0.438***          |
|                                         | Household Savings    | 0.036(0.010)        | 0.307**            |
|                                         | Personal             | -0.139(0.021)       | -0.489***          |

|                      |                      |               |           |
|----------------------|----------------------|---------------|-----------|
|                      | Development          |               |           |
|                      | Risk Behaviors       | 0.115(0.026)  | 0.407***  |
|                      | Safe Driving         | 0.131(0.023)  | 0.334***  |
| Health               |                      |               |           |
|                      | Household Savings    | -0.031(0.010) | -0.218*** |
|                      | Personal Development | 0.116(0.019)  | 0.333***  |
|                      | Risk Behaviors       | -0.074(0.022) | -0.214**  |
|                      | Safe Driving         | -0.066(0.023) | -0.138**  |
| Household Savings    |                      |               |           |
|                      | Personal Development | -0.030(0.010) | -0.168**  |
|                      | Risk Behaviors       | 0.039(0.015)  | 0.217*    |
|                      | Safe Driving         | 0.036(0.010)  | 0.307**   |
| Personal Development |                      |               |           |
|                      | Risk Behaviors       | -0.055(0.025) | -0.127*   |
|                      | Safe Driving         | -0.126(0.031) | -0.209*** |
| Risk Behaviors       |                      |               |           |
|                      | Safe Driving         | 0.115(0.026)  | 0.407***  |

---

\*  $p < 0.05$ , \*\*  $p < 0.01$ , \*\*\*  $p < 0.001$
